# Supplementary figures and images for: Chronic Kidney Disease Alters Vitamin A Homeostasis via Effects on Hepatic RBP4 Protein Expression and Metabolic Enzymes
Source: PubMed Central journal article supplement — Clin Transl Sci. 2016 Jun 9;9(4):207–15. doi: 10.1111/cts.12402 (PMC5351338; doi:10.1111/cts.12402), 2016-06-09

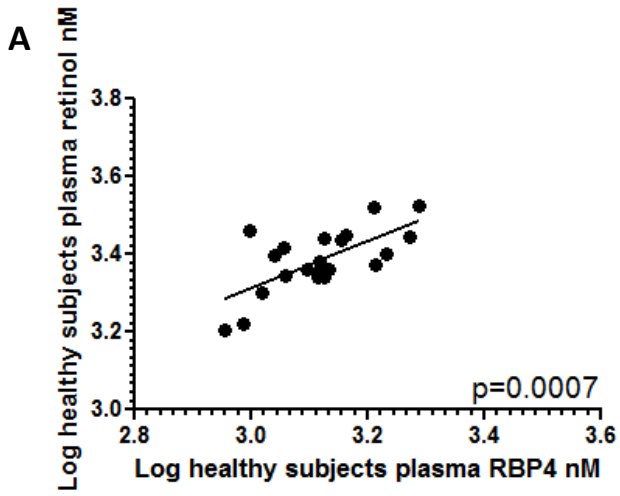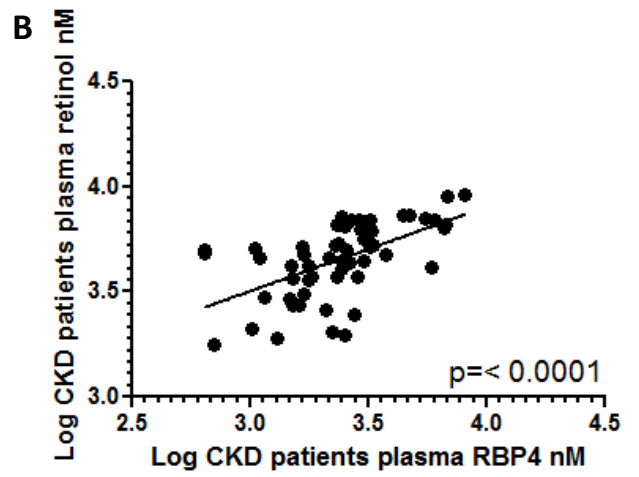

Supplement: CTS-9-207-s002.pdf [file CTS-9-207-s002.pdf]

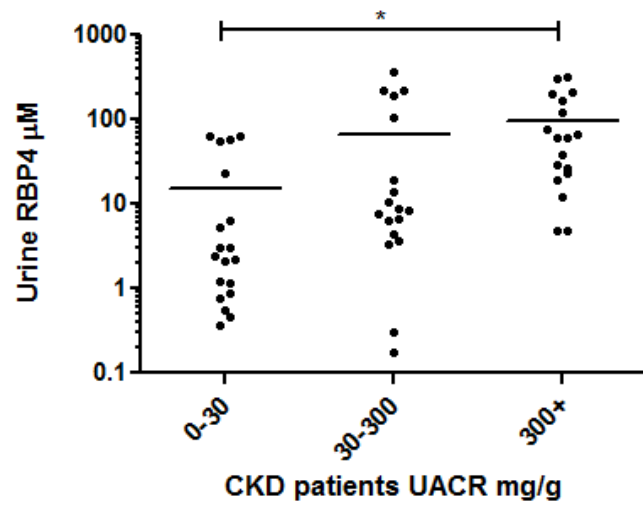

Supplement: CTS-9-207-s003.pdf [file CTS-9-207-s003.pdf]

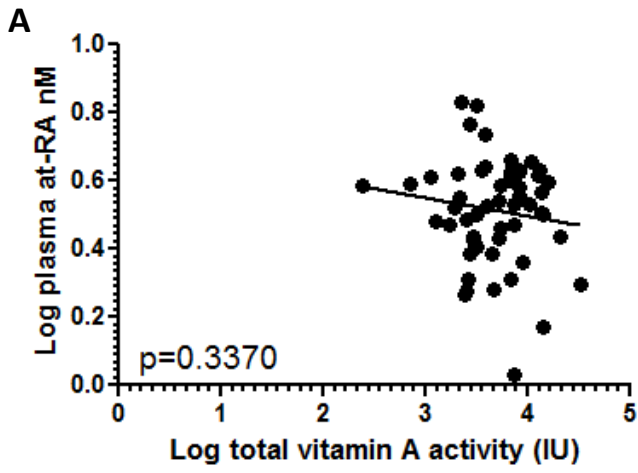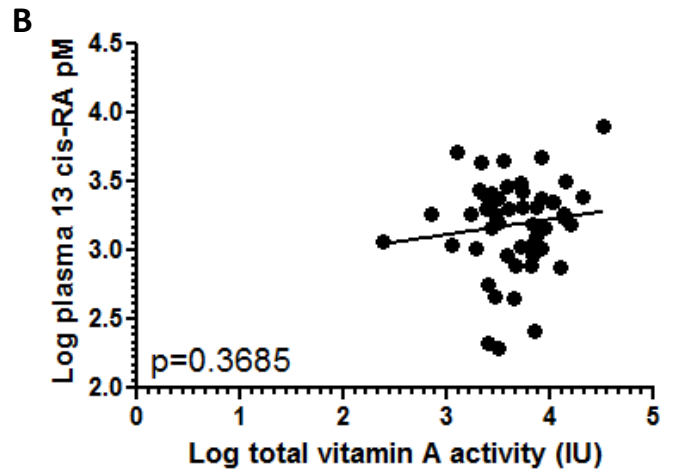

Supplement: CTS-9-207-s004.pdf [file CTS-9-207-s004.pdf]
